# Supplementary material for: Laparoscopic Versus Open Colorectal Surgery in the Emergency Setting: A Systematic Review and Meta-analysis
Source: PubMed Central journal article supplement — Ann Surg Open. 2021 Sep 14;2(3):e097. doi: 10.1097/AS9.0000000000000097 (PMC10455067; doi:10.1097/as9.0000000000000097), 2021-09-14
Supplement: as9-2-e097-s001.pdf [file as9-2-e097-s001.pdf]

**Supplementary figure 1 A-C: Forest plots for overall morbidity after emergency colorectal surgery, laparoscopic vs. open approach for complicated diverticulitis, IBD and colorectal cancer.**

**Forest plot 1A: overall morbidity complicated diverticulitis.**

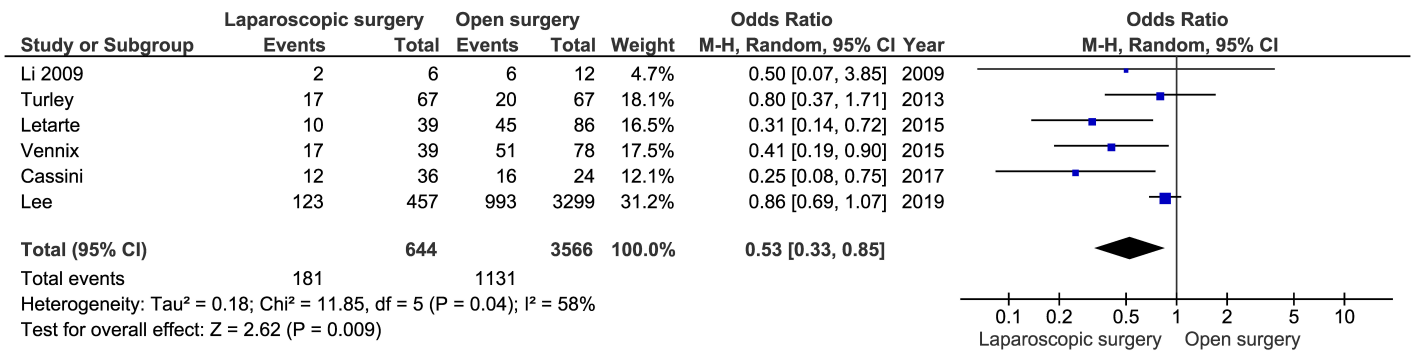

Suppl. Fig. 1A) Overall morbidity after laparoscopic vs open emergency surgery for complicated diverticulitis.

**Forest plot 1B: overall morbidity IBD.**

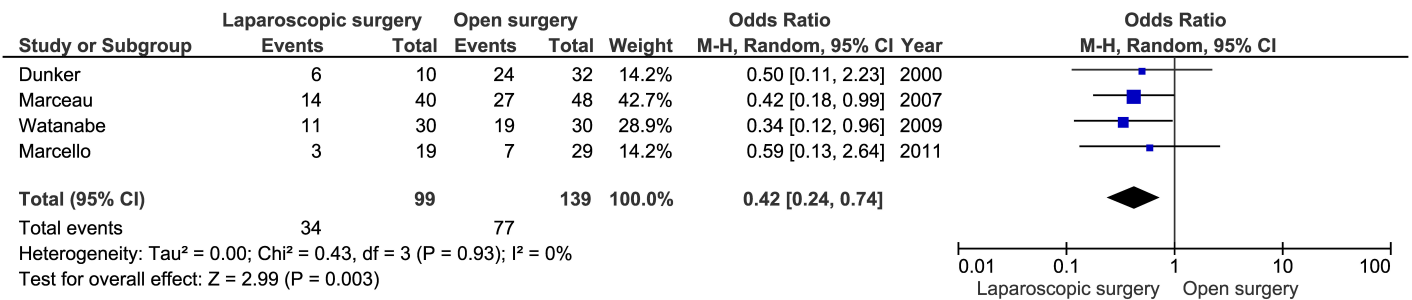

Suppl. Fig. 1B) Overall morbidity after laparoscopic vs open emergency surgery for Inflammatory bowel disease.

Forest plot 1C: overall morbidity colorectal cancer.

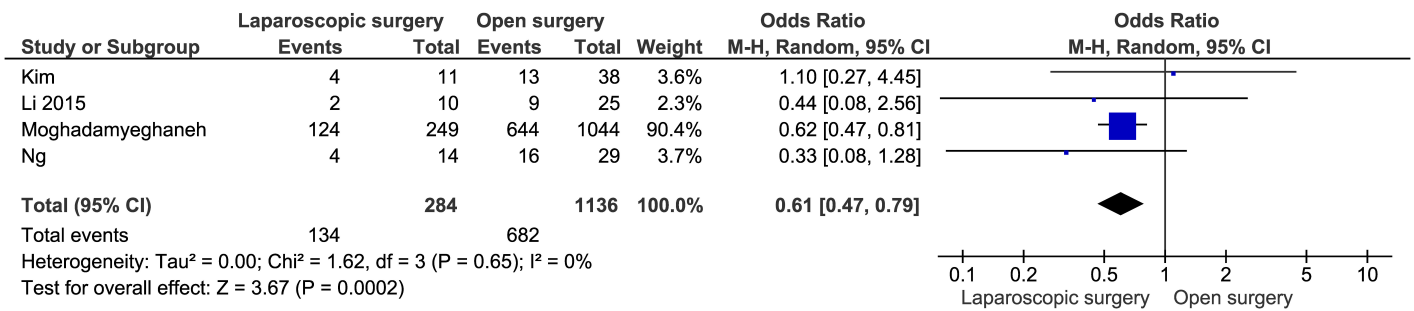

Suppl. Fig. 1C) Overall morbidity after laparoscopic vs open emergency surgery for colorectal cancer.
