# Supplementary material for: Laparoscopic Versus Open Colorectal Surgery in the Emergency Setting: A Systematic Review and Meta-analysis
Source: PubMed Central journal article supplement — Ann Surg Open. 2021 Sep 14;2(3):e097. doi: 10.1097/AS9.0000000000000097 (PMC10455067; doi:10.1097/as9.0000000000000097), 2021-09-14
Supplement: as9-2-e097-s003.pdf [file as9-2-e097-s003.pdf]

**SUPPLEMENTARY TABLE 1: Electronic search strategy in Pubmed, Embase and Cochrane.**

**Electronic search strategy**

**Database:** PubMed, Embase, Cochrane and CINAHL

**Filters:** Only comparative studies (case-control, case-matched, cohort studies), N≥ 10, no animal studies

**Initial search performed:** June 4<sup>th</sup> 2020

**Last rerun search performed:** January 6<sup>th</sup> 2021

**Total hits (unique):** 1,772

**Search terms Pubmed (N=1,154)**

("Colonic Diseases"[Mesh] OR "Rectal Diseases"[Mesh] OR colorectal\*[tiab] OR colo-rectal\*[tiab] OR gastrointestinal\*[tiab] OR gastro-intest\*[tiab] OR colon\*[tiab] OR colectom\*[tiab] OR hartmann\*[tiab] OR rectal[tiab] OR rectum[tiab]) AND ("Emergencies"[Mesh] OR "Emergency Service, Hospital"[Mesh] OR "Emergency Treatment"[Mesh] OR "Critical Care"[Mesh] OR emergenc\*[tiab] OR acute\*[tiab] OR non-electiv\*[tiab] OR urgen\*[tiab] OR critical\*[tiab]) AND ("surgery" [Subheading] OR surger\*[tiab] OR surgical[tiab] OR operation[tiab] OR open[tiab])

AND ("Laparoscopy"[Mesh] OR laparoscop\*[tiab])

AND ("Controlled Clinical Trial" [Publication Type] OR "Randomized Controlled Trial" [Publication Type] OR "Cohort Studies"[Mesh] OR "Comparative Study" [Publication Type] OR "Evaluation Study" [Publication Type] OR random\*[tiab] OR cohort[tiab] OR controlled clinical trial\*[tiab] OR controlled trial\*[tiab] OR trial[tiab] OR compar\*[tiab]) NOT ("Letter"[Publication Type] OR "Editorial"[Publication Type] OR "Comment"[Publication Type] OR "Case Reports" [Publication Type] OR letter[ti] OR editorial[ti] OR case report[ti]) NOT (("Animals"[Mesh] OR "Animal Experimentation"[Mesh] OR "Models, Animal"[Mesh] OR rat[tiab] OR rats[tiab] OR mice[tiab] OR mouse[tiab]) NOT ("Humans"[Mesh] OR human\*[tiab]))

**Search terms Embase (N = 1,147)**

1. exp colon disease/su or exp rectum disease/su or (colorectal\* or colo-rectal\* or gastrointestinal\* or gastro-intest\* or colon\* or colectom\* or hartmann\* or rectal or rectum).ti,ab,kw.
2. open surgery/ or (surger\* or surgical or operation or open).ti,ab,kw.
3. emergency/ or emergency treatment/ or exp emergency care/ or hospital emergency service/ or (emergenc\* or acute\* or non-electiv\* or urgen\* or critical\*).ti,ab,kw.
4. exp laparoscopy/ or laparoscop\*.ti,ab,kw.
5. randomized controlled trial/ or controlled clinical trial/ or controlled study/ or cohort analysis/ or comparative study/ or evaluation study/ or major clinical study/ or (random\* or cohort or controlled clinical trial\* or controlled trial\* or trial or compar\*).ti,ab,kw.
6. 1 and 2 and 3 and 4 and 5
7. letter/ or editorial/ or note/ or case report/ or conference paper/ or (letter or comment or editorial or case report).ti.
8. 6 not 7
9. (exp animal/ or exp animal experiment/ or exp animal model/ or (rat or rats or mice or mouse).ti,ab,kw.) not (human/ or human\*.ti,ab,kw.)
10. 8 not 9
11. limit 10 to conference abstract status
12. 10 not 11

**Search terms Cochrane (N = 313)**

1. (colonic diseases or rectal diseases or colorectal\* or colo-rectal\* or gastrointestinal\* or gastro-intest\* or colon\* or colectom\* or hartmann\* or rectal or rectum):ti,ab,kw
2. (surger\* or surgical or operation or open):ti,ab,kw
3. (emergenc\* or acute\* or non-electiv\* or urgen\* or critical\*):ti,ab,kw 185890
4. (laparoscop\*):ti,ab,kw
5. #1 and #2 and #3 and #4 in Trials

**Search terms CINAHL (N=227)**

1. (MH "Colonic Diseases+") OR (MH "Rectal Diseases+") OR ( TI ( colorectal\* or colo-rectal\* or gastrointestinal\* or gastro-intest\* or colon\* or colectom\* or hartmann\* or rectal or rectum ) OR ( colorectal\* or colo-rectal\* or gastrointestinal\* or gastro-intest\* or colon\* or colectom\* or hartmann\* or rectal or rectum ) )
2. AND (MH "Surgery, Operative+") OR ( TI ( surger\* or surgical or operation or open ) OR AB ( surger\* or surgical or operation or open ) )
3. AND ( (MH "Emergencies+") OR ( (MH "Emergency Service+") OR (MH "Emergency Patients") ) ) OR (MH "Critical Care+") OR ( TI ( emergenc\* or acute\* or non-electiv\* or urgen\* or critical\* ) OR AB ( emergenc\* or acute\* or non-electiv\* or urgen\* or critical\* ) ) )
4. AND (MH "Laparoscopy") OR TI laparoscop\* OR AB laparoscop\*
5. ( (MH "Clinical Trials+") OR (MH "Randomized Controlled Trials+") ) OR (MH "Comparative Studies+") OR ( random\* or cohort or controlled clinical trial\* or controlled trial\* or trial or compar\* ) OR ( random\* or cohort or controlled clinical trial\* or controlled trial\* or trial or compar\* ) )

**SUPPLEMENTARY TABLE 2: Patient characteristics and study setting.**

| Study                   | Detailed indication(s)                                                                                                                                                          | Approach | N     | Age (mean, SD)                                                | Gender (M:F)<br>N | ASA-score (I:II:III:IV) %          | Cardiac Comorbidity<br>N (%) | Pulmonary Comorbidity<br>N (%) | Setting            | Definition                                                                                                                                                                                                                   |
|-------------------------|---------------------------------------------------------------------------------------------------------------------------------------------------------------------------------|----------|-------|---------------------------------------------------------------|-------------------|------------------------------------|------------------------------|--------------------------------|--------------------|------------------------------------------------------------------------------------------------------------------------------------------------------------------------------------------------------------------------------|
| <i>Ballian et al.</i>   | Intestinal obstruction, malignant neoplasm, diverticulitis, vascular insufficiency, inflammatory bowel disease                                                                  | Lap      | 341   | 10-49 (18%), 50-50 (17%), 60-69 (23%), 70-79 (19%), >80 (22%) | 149:192           | I&II 43%, III 43%, IV 13%, V 1%    | -                            | 70 (21)                        | Emergency          | The NSQIP definition of emergency surgery relies on designation as such by the surgeon and anesthesiologist and includes only operations performed within 12 h of admission or of symptom onset.                             |
|                         |                                                                                                                                                                                 | Open     | 3,211 | 10-49 (19%), 50-59 (18%), 60-69 (20%), 70-79 (22%), >80 (20%) | 1451:1760         | I&II 29%, III 42%, IV 26%, V 0%    | -                            | 1,048 (33)                     |                    |                                                                                                                                                                                                                              |
| <i>Cassini et al.</i>   | Hemodynamically stable patients treated with diffuse diverticular peritonitis (Hinchey III and IV)                                                                              | Lap      | 36    | 66.5 (30-86)                                                  | 14:22             | I: -, II: -, III: 55.6%, IV: 44.4% | -                            | -                              | Urgent             | NM                                                                                                                                                                                                                           |
|                         |                                                                                                                                                                                 | Open     | 24    | 65.8 (41-96)                                                  | 06:18             | I: -, II: -, III: 58.3%, IV: 41.7% | -                            | -                              |                    |                                                                                                                                                                                                                              |
| <i>Catani et al.</i>    | Colonic perforation, obstruction, hemorrhage, neoplastic disease, diverticular disease, colonic neoplasms, inflammatory bowel disease, iatrogenic perforation after colonoscopy | Lap      | 32    | 50 (19.0)*                                                    | 19:13             | -                                  | -                            | -                              | Emergency & Urgent | The treatment was given within 12 hours of admission in the emergent setting. Urgent: if the patient was unable to be discharged because of deteriorating conditions, hence surgery was necessary during the same admission. |
|                         |                                                                                                                                                                                 | Open     | 61    | 55 (16.4)*                                                    | 29:32             | -                                  | -                            | -                              |                    |                                                                                                                                                                                                                              |
| <i>Cocorullo et al.</i> | Colonic acute diseases or obstruction                                                                                                                                           | Lap      | 31    | >70                                                           | -                 | -                                  | -                            | -                              | Emergency          | NM                                                                                                                                                                                                                           |
|                         |                                                                                                                                                                                 | Open     | 36    | >70                                                           | -                 | -                                  | -                            | -                              |                    |                                                                                                                                                                                                                              |
| <i>Cui et al.</i>       | Colorectal rupture due to oncological, and non-oncological reasons                                                                                                              | Lap      | 65    | -                                                             | -                 | -                                  | -                            | -                              | Emergency          | NM                                                                                                                                                                                                                           |
|                         |                                                                                                                                                                                 | Open     | 63    | -                                                             | -                 | -                                  | -                            | -                              |                    |                                                                                                                                                                                                                              |
| <i>Dunker et al.</i>    | Severe acute colitis (including morbus Crohn & ulcerative colitis)                                                                                                              | Lap      | 10    | 33 (7.7)*                                                     | 3:7               | -                                  | -                            | -                              | Emergency          | After prior medical treatment.                                                                                                                                                                                               |
|                         |                                                                                                                                                                                 | Open     | 32    | 37 (12.1)*                                                    | 14:18             | -                                  | -                            | -                              |                    |                                                                                                                                                                                                                              |
| <i>Gietelink et al.</i> | Primary colorectal cancer                                                                                                                                                       | Lap      | 694   | -                                                             | -                 | -                                  | -                            | -                              | Emergency          | Non-elective; Surgery within 48 hours after admission. Including both urgent and emergency cases.                                                                                                                            |
|                         |                                                                                                                                                                                 | Open     | 4,498 | -                                                             | -                 | -                                  | -                            | -                              |                    |                                                                                                                                                                                                                              |
| <i>Harji et al.</i>     | Colorectal cancer, diverticular disease, inflammatory bowel disease, other                                                                                                      | Lap      | 33    | 18-49 (7), 50-59 (4), 60-69 (11), 70-79 (6), >80 (5)          | -                 | I: 18%, II: 67%, III: 15%, IV: -   | -                            | -                              | Emergency          | Patients required surgery within 2 - 6 hours (classification 2A) or 6 - 18 hours (classification 2B)                                                                                                                         |

|                         |                                                                                                                                                            |      |        |                                                      |              |                                            |           |             |                    |                                                                                                                                                                                                                                                   |
|-------------------------|------------------------------------------------------------------------------------------------------------------------------------------------------------|------|--------|------------------------------------------------------|--------------|--------------------------------------------|-----------|-------------|--------------------|---------------------------------------------------------------------------------------------------------------------------------------------------------------------------------------------------------------------------------------------------|
|                         |                                                                                                                                                            | Open | 31     | 18-49 (9), 50-59 (4), 60-69 (11), 70-79 (5), >80 (7) | -            | I: 32%, II: 45%, III: 23%, IV: -           | -         | -           |                    |                                                                                                                                                                                                                                                   |
| <i>Keller et al.</i>    | Colorectal cancer, diverticulitis/ obstruction/ functional disorders, peritonitis/ adhesive disease, bleeding, non-infectious enteritis and colitis        | Lap  | 954    | 65.4 (16.2)*                                         | 527:418      | -                                          | -         | -           | Emergency & Urgent | Emergency: Patient requires immediate medical intervention as a result of severe, life threatening or potentially disabling conditions. Urgent: Patient required immediate attention for the care and treatment of a physical or mental disorder. |
|                         |                                                                                                                                                            | Open | 21,774 | 64.9 (16.5)*                                         | 11,934:9,840 | -                                          | -         | -           |                    |                                                                                                                                                                                                                                                   |
| <i>Kim et al.</i>       | Obstruction, perforation, bleeding, ischemia                                                                                                               | Lap  | 11     | 67 (13.0)*                                           | 5:6          | I: 27%, II: 55%, III: 18%, IV 0%           | -         | -           | Emergency          | NM                                                                                                                                                                                                                                                |
|                         |                                                                                                                                                            | Open | 23     | 68 (12.0)*                                           | 27:11        | I: 5%, II: 61%, III: 32%, IV: 3%           | -         | -           |                    |                                                                                                                                                                                                                                                   |
| <i>Koh et al.</i>       | Bleeding, obstruction, perforation with as underlying diagnosis appendiceal mass, diverticular disease, neoplasm, postprocedural perforation               | Lap  | 23     | <40 (21.7%), 40-60 (30.4%), >60 (47.8%)              | 13:10        | I: 21.7%, II: 52.2%, III: 26.1%, IV: 0%    | 3 (13.0)  | -           | Emergency          | NM                                                                                                                                                                                                                                                |
|                         |                                                                                                                                                            | Open | 23     | <40 (21.7%), 40-60 (30.4%), >60 (47.8%)              | 13:10        | I: 26.1%, II: 39.1%, III: 17.4%, IV: 17.4% | 2 (8.7)   | -           |                    |                                                                                                                                                                                                                                                   |
| <i>Lee et al.</i>       | Acute perforated diverticulitis, Hinchey IV                                                                                                                | Lap  | 457    | 61.8 (13.7)                                          | 131:326      | I: 1.43% II: 30.8% III: 46.2% IV: 21.5%    | 2 (0.71)  | 35 (12.58)  | Emergency          | Operation within 48h after admission                                                                                                                                                                                                              |
|                         |                                                                                                                                                            | Open | 3,299  | 62.8 (13.9)                                          | 1,578:1,721  | I: 1.89%, II: 30.5%, III: 47.4%, IV: 20.3% | 84 (2.54) | 641 (19.43) |                    |                                                                                                                                                                                                                                                   |
| <i>Letarte et al.</i>   | Complicated diverticular disease; Hinchey I-IV                                                                                                             | Lap  | 39     | 61.6 (13.7)                                          | 12:27        | I: 2.6%, II: 76.9%, III: 20.5%, IV: 0%     | -         | -           | Emergency          | A total 83 patients received upfront surgery, 42 received surgery after failing medical treatment                                                                                                                                                 |
|                         |                                                                                                                                                            | Open | 86     | 60.9 (12.0)                                          | 53:33        | I: 1.2%, II: 70.9%, III: 24.4%, IV: 0%     | -         | -           |                    |                                                                                                                                                                                                                                                   |
| <i>Li et al. (2009)</i> | Preoperative diagnosis of acute appendicitis for which a diagnostic laparoscopy was done with intraoperative diagnosis of complicated cecal diverticulitis | Lap  | 6      | 47 (30-87)'                                          | 4:2          | -                                          | -         | -           | Emergency          | NM                                                                                                                                                                                                                                                |
|                         |                                                                                                                                                            | Open | 12     | 48.5 (16-68)'                                        | 6:6          | -                                          | -         | -           |                    |                                                                                                                                                                                                                                                   |
| <i>Li et al. (2015)</i> |                                                                                                                                                            | Lap  | 10     | 64.5 (9.7)*                                          | 6:4          | -                                          | -         | -           | Emergency          | NM                                                                                                                                                                                                                                                |

|                                |                                                                                                                                                                |      |       |                |         |                                           |          |          |                    |                                                                                                                                                                                                  |
|--------------------------------|----------------------------------------------------------------------------------------------------------------------------------------------------------------|------|-------|----------------|---------|-------------------------------------------|----------|----------|--------------------|--------------------------------------------------------------------------------------------------------------------------------------------------------------------------------------------------|
|                                | Right-sided obstructive colon cancer                                                                                                                           | Open | 25    | 62.3 (10.2)*   | 14:11   | -                                         | -        | -        |                    |                                                                                                                                                                                                  |
| <i>Liu et al.</i>              | Left-sided obstructive colon cancer                                                                                                                            | Lap  | 55    | 60.36 (16.8)*  | 31:24   | -                                         | -        | -        | -                  | NM                                                                                                                                                                                               |
|                                |                                                                                                                                                                | Open | 135   | 60.86 (14.43)* | 84:54   | -                                         | -        | -        |                    |                                                                                                                                                                                                  |
| <i>Marceau et al.</i>          | Severe or acute colitis including ulcerative colitis, Crohn's disease and indeterminate colitis (without peritonitis, colonic perforation, or toxic megacolon) | Lap  | 40    | 41 (51)*       | 22:18   | 2.1 (0.4)                                 | -        | -        | Acute & Severe     | Acute: Surgery after failing medical treatment                                                                                                                                                   |
|                                |                                                                                                                                                                | Open | 48    | 37 (16)*       | 25:23   | 2 (0.5)                                   | -        | -        |                    |                                                                                                                                                                                                  |
| <i>Marcello et al.</i>         | Acute colitis (ulcerative disease and morbus Crohn)                                                                                                            | Lap  | 19    | 32 (15-60)'    | 10:9    | -                                         | -        | -        | Acute              | NM                                                                                                                                                                                               |
|                                |                                                                                                                                                                | Open | 29    | 33 (20-58)'    | 13:16   | -                                         | -        | -        |                    |                                                                                                                                                                                                  |
| <i>Moghadamyeghaneh et al.</i> | Malignant obstruction in cecum, ascending colon, hepatic flexure, transverse colon, splenic flexure, descending colon, sigmoid and rectosigmoid                | Lap  | 249   | 69 (14.0)      | 117:132 | I: 0.2%, II: 30.9%, III: 53%, IV: 14.1%   | 2 (0.8)  | 8 (3.2)  | Emergency          | The NSQIP definition of emergency surgery relies on designation as such by the surgeon and anesthesiologist and includes only operations performed within 12 h of admission or of symptom onset. |
|                                |                                                                                                                                                                | Open | 1,044 | 68 (16.0)      | 530:514 | I: 2.2%, II: 23.3%, III: 52.6%, IV: 21.9% | 20 (1.9) | 73 (7.0) |                    |                                                                                                                                                                                                  |
| <i>Nash et al.</i>             | Ulcerative colitis, Crohn's disease, infectious colitis, volvulus, cancer, diverticulosis/itis, angiodysplasia, other                                          | Lap  | 36    | 55 (21-86)     | 15:21   | 2.6 (2-4)                                 | -        | -        | Emergency & Urgent | NM                                                                                                                                                                                               |
|                                |                                                                                                                                                                | Open | 32    | 63 (18-85)     | 17:15   | 3.1 (2-5)                                 | -        | -        |                    |                                                                                                                                                                                                  |
| <i>Ng et al.</i>               | Obstructing right-sided colonic carcinoma                                                                                                                      | Lap  | 14    | 68.5 (45-80)'  | 6:8     | I: 21.4%, II: 64.3%, III: 14.3%, IV: 0%   | -        | -        | Emergency          | Surgery within 48 hours after admission                                                                                                                                                          |
|                                |                                                                                                                                                                | Open | 29    | 71 (44-94)'    | 14:15   | I: 10.3%, II: 62.1%, III: 24.1%, IV: 3.4% | -        | -        |                    |                                                                                                                                                                                                  |
| <i>Odermatt et al.</i>         | Colorectal cancer: pericolic abscess, perforation, obstruction, or unspecified                                                                                 | Lap  | 36    | 74.0 (32-93)'  | 15:21   | I: 11.1%, II: 47.2%, III: 38.9%, IV: 2.8% | -        | -        | Emergency          | NM                                                                                                                                                                                               |
|                                |                                                                                                                                                                | Open | 72    | 77.5 (30-92)'  | 97:84   | I: 13.3%, II: 44.2%, III: 36.5%, IV: 6.1% | -        | -        |                    |                                                                                                                                                                                                  |
| <i>Schlaricke et al.</i>       | Colon perforation by colonoscopy                                                                                                                               | Lap  | 24    | 68 (35-91)     | 10:14   | -                                         | 4 (16.7) | 2 (8.3)  | Emergency          | NM                                                                                                                                                                                               |
|                                |                                                                                                                                                                | Open | 12    | 76 (48-89)     | 17:19   | -                                         | 1 (8.3)  | 2 (16.3) |                    |                                                                                                                                                                                                  |

|                               |                                                                                                               |      |        |                                                    |              |                                                                                        |            |           |                    |                                                                                                                                                                                                                          |
|-------------------------------|---------------------------------------------------------------------------------------------------------------|------|--------|----------------------------------------------------|--------------|----------------------------------------------------------------------------------------|------------|-----------|--------------------|--------------------------------------------------------------------------------------------------------------------------------------------------------------------------------------------------------------------------|
| <i>Stulberg et al.</i>        | Bowel obstruction, perforated viscus, fulminant colitis, ischemia, uncontrollable gastrointestinal hemorrhage | Lap  | 40     | 61.5 (63)                                          | 17:23        | I: 30%, II:58%, III: 10%, IV: 2%<br>I: 28%, II: 56%, III: 16%, IV: 0%                  | 15 (40.0)  | 4 (10.0)  | Emergency & Urgent | Emergency as soon as possible. Urgent if a patient was unable to be discharged because of their deteriorating condition and then underwent surgery while in the hospital.                                                |
|                               |                                                                                                               | Open | 25     | 60.1 (65)                                          | 11:14        |                                                                                        | 10 (40.0)  | 2 (8.0)   |                    |                                                                                                                                                                                                                          |
| <i>Sujatha-bhaskar et al.</i> | Diverticulitis and colon cancer                                                                               | Lap  | 1,039  | 60 (19)*                                           | 460:535*     | -                                                                                      | 78 (7.8)   | 17 (1.7)  | Emergency          | NM                                                                                                                                                                                                                       |
|                               |                                                                                                               | Open | 8,979  | 65 (16)*                                           | 4,197:4,826* | -                                                                                      | 999 (11.1) | 285 (3.2) |                    |                                                                                                                                                                                                                          |
| <i>Turley et al.</i>          | Colonic diverticulitis with or without hemorrhage                                                             | Lap  | 67     | 58.5 (16.3)                                        | 41:26        | I&II: 47.8%, III&IV: 52.2%<br>I&II: 40.3%, III&IV: 59.7%                               | 5 (7.5)    | -         | Emergency          | The NSQIP definition of emergency surgery relies on designation as such by the surgeon and anesthesiologist and includes only operations performed within 12 h of admission or of symptom onset.                         |
|                               |                                                                                                               | Open | 67     | 59.4 (13.5)                                        | 40:27        |                                                                                        | 7 (10.4)   | -         |                    |                                                                                                                                                                                                                          |
| <i>Vallance et al.</i>        | Perforated diverticulitis (Hinchey III & IV)                                                                  | Lap  | 3,435  | 0-64: 32.7%, 65-74: 27.5%, 75-84: 29.2%, >85 10.7% | 1,764:1,671  | I: 15.7%, II: 46.1%, III: 32.3%, IV: 6.0%<br>I: 9.9%, II: 41.4%, III: 37.7%, IV: 11.3% | -          | -         | Emergency & Urgent | NM                                                                                                                                                                                                                       |
|                               |                                                                                                               | Open | 12,081 | 0-64: 29.1%, 65-74: 26.4%, 75-84: 31.4%, >85 13.0% | 6,120:5,961  |                                                                                        | -          | -         |                    |                                                                                                                                                                                                                          |
| <i>Vennix et al.</i>          | Perforated diverticulitis (Hinchey III & IV)                                                                  | Lap  | 39     | 56.2 (14.2)                                        | 14:25        | I: 22.6%, II: 38.7%, III: 35.5%, IV: 3.2%<br>I: 23.6%, II: 52.7%, III: 20%, IV: 3.6%   | -          | -         | Emergency & Urgent | Urgent: as soon as possible after resuscitation and usually within 24 hours. Emergency: immediate and life-saving operation, resuscitation simultaneous with surgical treatment with operation usually within two hours. |
|                               |                                                                                                               | Open | 78     | 56.4 (13.3)                                        | 24:58        |                                                                                        | -          | -         |                    |                                                                                                                                                                                                                          |
| <i>Watanabe et al.</i>        | Severe ulcerative colitis                                                                                     | Lap  | 30     | 26.9 (13-64)                                       | 17:13        | -                                                                                      | -          | -         | Emergency          | NM                                                                                                                                                                                                                       |
|                               |                                                                                                               | Open | 30     | 35.7 (19-84)                                       | 19:11        | -                                                                                      | -          | -         |                    |                                                                                                                                                                                                                          |

Suppl. Table 2) definitions of the short-term outcomes as reported in the original studies.

\*: mean, SD

^: median, IQR

': median, range

\*Sujatha-Bhaskar et al.: numbers presented are from an as-treated analysis.

**SUPPLEMENTARY TABLE 3A: Short-term outcomes after laparoscopic vs open emergency colorectal surgery.**

| Study                   | Approach | N      | Mortality<br>N (%) | Overall morbidity<br>N (%) | ICU<br>admissions*<br>N (%) | Reinter-<br>ventions<br>N (%) | Wound<br>infection**<br>N (%) | Wound<br>dehiscence<br>N (%) | Ileus<br>N (%) | Pulmonary<br>complications***<br>N (%) | Cardiac<br>complications****<br>N (%) | LOS*****<br>(mean, SD) |
|-------------------------|----------|--------|--------------------|----------------------------|-----------------------------|-------------------------------|-------------------------------|------------------------------|----------------|----------------------------------------|---------------------------------------|------------------------|
| <i>Ballian et al.</i>   | Lap      | 341    | 18 (5.0)           | 106 (31.0)                 | 20 (6.0)                    | 34 (10.0)                     | -                             | -                            | -              | 10 (3.0)                               | -                                     | 11.2 (12.6)            |
|                         | Open     | 3,211  | 420 (13.0)         | 1,409 (44.0)               | 546 (17.0)                  | 529 (16.0)                    | -                             | -                            | -              | 321 (10.0)                             | -                                     | 15 (16.2)              |
| <i>Cassini et al.</i>   | Lap      | 36     | 6 (16.6)           | 12 (33.3)                  | 4 (11.0)                    | -                             | 4 (11.1)                      | 2 (5.0)                      | 2 (5.5)        | 2 (5.5)                                | 2 (5.5)                               | 8.1 (4-30)*            |
|                         | Open     | 24     | 4 (16.6)           | 16 (66.7)                  | 2 (8.3)                     | -                             | 12 (50.0)                     | 6 (25.0)                     | 0 (0.0)        | 2 (8.3)                                | 0 (0.0)                               | 12.8 (5-23)*           |
| <i>Catani et al.</i>    | Lap      | 32     | 0 (0.0)            | 0 (0.0)                    | -                           | -                             | -                             | 0 (0.0)                      | -              | -                                      | -                                     | 6 (4-12)†              |
|                         | Open     | 61     | 1 (1.6)            | 9 (5.5)                    | -                           | -                             | -                             | 3 (1.8)                      | -              | -                                      | -                                     | 8 (5-69)†              |
| <i>Cocorullo et al.</i> | Lap      | 31     | 1 (3.2)            | 4 (12.9)                   | -                           | -                             | -                             | -                            | -              | -                                      | -                                     | -                      |
|                         | Open     | 36     | 2 (5.5)            | 7 (19.4)                   | -                           | -                             | -                             | -                            | -              | -                                      | -                                     | -                      |
| <i>Cui et al.</i>       | Lap      | 65     | -                  | 2 (3.1)                    | -                           | -                             | 1 (1.5)                       | -                            | -              | -                                      | -                                     | 6.04 (± 1.16)          |
|                         | Open     | 63     | -                  | 15 (23.8)                  | -                           | -                             | 4 (6.3)                       | -                            | -              | -                                      | -                                     | 9.96 (± 1.84)          |
| <i>Dunker et al.</i>    | Lap      | 10     | 0 (0.0)            | 6 (60.0)                   | -                           | 2 (20.0)                      | -                             | 0 (0.0)                      | -              | -                                      | -                                     | 14.6 (12.5)            |
|                         | Open     | 32     | 0 (0.0)            | 24 (75.0)                  | -                           | 5 (15.6)                      | -                             | 2 (8.3)                      | -              | -                                      | -                                     | 18 (9.5)               |
| <i>Gietelink et al.</i> | Lap      | 694    | 30 (4.3)           | -                          | -                           | -                             | -                             | -                            | -              | -                                      | -                                     | -                      |
|                         | Open     | 4,498  | 379 (8.4)          | -                          | -                           | -                             | -                             | -                            | -              | -                                      | -                                     | -                      |
| <i>Harji et al.</i>     | Lap      | 33     | 0 (0.0)            | 12 (36.0)                  | -                           | -                             | -                             | -                            | -              | -                                      | -                                     | -                      |
|                         | Open     | 31     | 1 (3.0)            | 13 (42.0)                  | -                           | -                             | -                             | -                            | -              | -                                      | -                                     | -                      |
| <i>Keller et al.</i>    | Lap      | 954    | 29 (3.1)           | 274 (29.0)                 | -                           | -                             | -                             | -                            | -              | -                                      | -                                     | 10.8 (8.0)             |
|                         | Open     | 21,774 | 1,442 (6.6)        | 8,286 (38.1)               | -                           | -                             | -                             | -                            | -              | -                                      | -                                     | 14.8 (14.0)            |
| <i>Kim et al.</i>       | Lap      | 11     | 0 (0.0)            | 4 (36.0)                   | 1 (9.0)                     | -                             | -                             | -                            | 1 (9.0)        | 1 (9.0)                                | -                                     | 13 (4.0)               |
|                         | Open     | 23     | 0 (0.0)            | 13 (34.0)                  | 29 (76.0)                   | -                             | -                             | -                            | 3 (7.9)        | 3 (7.9)                                | -                                     | 17 (10.0)              |
| <i>Koh et al.</i>       | Lap      | 23     | 0 (0.0)            | 11 (47.8)                  | -                           | 1 (4.3)                       | -                             | -                            | 4 (17.4)       | 4 (17.4)                               | -                                     | 6 (3-28)†              |
|                         | Open     | 23     | 0 (0.0)            | 13 (56.5)                  | -                           | 1 (4.3)                       | -                             | -                            | 7 (30.4)       | 1 (4.3)                                | -                                     | 7 (3-31)†              |
| <i>Lee et al.</i>       | Lap      | 457    | 10 (3.6)           | 123 (26.9)                 | 17 (3.7)                    | 35 (7.7)                      | 27 (5.8)                      | -                            | 139 (30.5)     | 33 (7.2)                               | -                                     | 11.2 (8.2)             |
|                         | Open     | 3,299  | 237 (7.2)          | 993 (30.1)                 | 221 (6.7)                   | 250 (7.6)                     | 280 (8.5)                     | -                            | 1,141 (34.6)   | 1,715 (5.2)                            | -                                     | 12.7 (10.2)            |
| <i>Letarte et al.</i>   | Lap      | 39     | 0 (0.0)            | 10 (25.6)                  | -                           | 1 (2.6)                       | 1 (2.6)                       | -                            | 5 (12.8)       | -                                      | -                                     | 8 (7-14)^              |
|                         | Open     | 86     | 4 (4.6)            | 45 (52.3)                  | -                           | 6 (7.0)                       | 16 (18.6)                     | -                            | 28 (32.6)      | -                                      | -                                     | 7 (5-9)^               |
| <i>Li et al. (2009)</i> | Lap      | 6      | 0 (0.0)            | 2 (33.3)                   | -                           | 0 (0.0)                       | 2 (33.3)                      | -                            | 0 (0.0)        | -                                      | -                                     | 7 (2.5)                |
|                         | Open     | 12     | 0 (0.0)            | 6 (50.0)                   | -                           | 1 (8.3)                       | 5 (41.7)                      | -                            | 3 (25.0)       | -                                      | -                                     | 8 (3.6)                |
| <i>Li et al. (2015)</i> | Lap      | 10     | 0 (0.0)            | 2 (20.0)                   | -                           | -                             | 1 (10.0)                      | -                            | -              | 1 (10.0)                               | -                                     | 7 (6-15)†              |
|                         | Open     | 25     | 0 (0.0)            | 9 (36.0)                   | -                           | -                             | 3 (12.0)                      | -                            | -              | 2 (8.0)                                | -                                     | 9 (7-20)†              |

**SUPPLEMENTARY TABLE 3A continued: Short-term outcomes after laparoscopic vs open emergency colorectal surgery.**

| Study                          | Approach | N      | Mortality<br>N (%) | Overall morbidity<br>N (%) | ICU<br>admissions*<br>N (%) | Reinter-<br>ventions<br>N (%) | Wound<br>infection**<br>N (%) | Wound<br>dehiscence<br>N (%) | Ileus<br>N (%) | Pulmonary<br>complications***<br>N (%) | Cardiac<br>complications****<br>N (%) | LOS*****<br>(mean, SD) |
|--------------------------------|----------|--------|--------------------|----------------------------|-----------------------------|-------------------------------|-------------------------------|------------------------------|----------------|----------------------------------------|---------------------------------------|------------------------|
| <i>Liu et al.</i>              | Lap      | 55     | 0 (0.0)            | 18 (32.7)                  | -                           | -                             | 3 (5.5)                       | -                            | 3 (5.5)        | 1 (1.8)                                | -                                     | 24.22 (17.09)          |
|                                | Open     | 135    | 1 (0.7)            | 40 (29.6)                  | -                           | -                             | 8 (5.9)                       | -                            | 6 (4.4)        | 5 (3.7)                                | -                                     | 24.19 (14.76)          |
| <i>Marceau et al.</i>          | Lap      | 40     | 0 (0.0)            | 14 (35.0)                  | -                           | 2 (6.0)                       | -                             | -                            | 3 (7.5)        | -                                      | -                                     | 9 (3.0)                |
|                                | Open     | 48     | 0 (0.0)            | 27 (56.0)                  | -                           | 5 (10.0)                      | -                             | -                            | 3 (6.3)        | -                                      | -                                     | 12 (7.0)               |
| <i>Marcello et al.</i>         | Lap      | 19     | -                  | 3 (16.0)                   | -                           | -                             | 2 (10.5)                      | -                            | 1 (5.3)        | -                                      | -                                     | 4 (3-13)'              |
|                                | Open     | 29     | -                  | 7 (24.0)                   | -                           | -                             | 3 (10.3)                      | -                            | 0 (0)          | -                                      | -                                     | 6 (4-24)'              |
| <i>Moghadamyeghaneh et al.</i> | Lap      | 249    | 8 (3.2)            | 124 (50.0)                 | 4 (1.6)                     | 22 (8.8)                      | 26 (10.4)                     | 4 (1.6)                      | 58 (23.3)      | 7 (2.8)                                | 4 (1.6)                               | 10                     |
|                                | Open     | 1,044  | 102 (9.8)          | 644 (61.8)                 | 46 (4.4)                    | 80 (7.7)                      | 130 (12.4)                    | 25 (2.4)                     | 323 (31.0)     | 91 (8.7)                               | 33 (3.1)                              | 13                     |
| <i>Nash et al.</i>             | Lap      | 36     | 0 (0.0)            | 20 (56.0)                  | -                           | -                             | -                             | -                            | -              | -                                      | -                                     | 12 (4-68)'             |
|                                | Open     | 32     | 5 (13.0)           | 23 (72.0)                  | -                           | -                             | -                             | -                            | -              | -                                      | -                                     | 23 (6-108)'            |
| <i>Ng et al.</i>               | Lap      | 14     | 1 (7.1)            | 4 (28.6)                   | -                           | -                             | 0 (0.0)                       | -                            | 3 (21.4)       | 0 (0.0)                                | -                                     | 7 (6-18)'              |
|                                | Open     | 29     | 3 (10.3)           | 16 (55.6)                  | -                           | -                             | 5 (17.2)                      | -                            | 1 (3.4)        | 3 (10.3)                               | -                                     | 9 (6-40)'              |
| <i>Odermatt et al.</i>         | Lap      | 36     | 3 (8.3)            | -                          | -                           | 5 (13.9)                      | 6 (16.7)                      | -                            | -              | -                                      | -                                     | 7.5 (2-45)'            |
|                                | Open     | 72     | 9 (12.5)           | -                          | -                           | 6 (8.3)                       | 3 (4.2)                       | -                            | -              | -                                      | -                                     | 11 (1-61)'             |
| <i>Schloricke et al.</i>       | Lap      | 24     | 1 (4.2)            | 6 (25.0)                   | 7 (29.2)                    | -                             | -                             | 0 (0.0)                      | 1 (4.2)        | 1 (4.2)                                | 2 (8.3)                               | 11 (7-25)'             |
|                                | Open     | 12     | 1 (8.3)            | 8 (66.7)                   | 5 (41.7)                    | -                             | -                             | 1 (4.2)                      | 2 (16.7)       | 1 (8.3)                                | 1 (8.3)                               | 14.5 (7-40)'           |
| <i>Stulberg et al.</i>         | Lap      | 40     | 1 (3.0)            | 18 (46.0)                  | 13 (33.0)                   | 2 (5.0)                       | 8 (21.0)                      | 0 (0.0)                      | -              | 1 (3.0)                                | 1 (3.0)                               | 7.9 (2-25)'            |
|                                | Open     | 25     | 2 (8.0)            | 15 (63.0)                  | 12 (48.0)                   | 1 (4.0)                       | 4 (17.0)                      | 1 (4.0)                      | -              | 2 (8.0)                                | 2 (8.0)                               | 11.3 (4-36)'           |
| <i>Sujatha-bhaskar et al.</i>  | Lap      | 1,039  | 48 (4.6)           | 368 (35.4)                 | -                           | 60 (5.8)                      | 109 (10.5)                    | -                            | 208 (20)       | 41 (3.9)                               | 12 (1.2)                              | -                      |
|                                | Open     | 8,979  | 1,206 (13.4)       | 5,356 (59.7)               | -                           | 708 (7.9)                     | 1,611 (17.9)                  | -                            | 2,952 (32.9)   | 856 (9.5)                              | 187 (2.1)                             | -                      |
| <i>Turley et al.</i>           | Lap      | 67     | 2 (3.0)            | 17 (25.4)                  | 5 (7.5)                     | 8 (11.9)                      | 4 (6.0)                       | 0 (0.0)                      | -              | 3 (4.5)                                | 0 (0.0)                               | 6 (5-11)^              |
|                                | Open     | 67     | 3 (4.5)            | 20 (30.0)                  | 5 (7.5)                     | 3 (4.5)                       | 12 (17.9)                     | 2 (3.0)                      | -              | 0 (0.0)                                | 0 (0.0)                               | 8 (6-11)^              |
| <i>Vallance et al.</i>         | Lap      | 3,435  | 242 (8.1)          | -                          | -                           | -                             | -                             | -                            | -              | -                                      | -                                     | 8 (5-15)^              |
|                                | Open     | 12,081 | 1,302 (13.0)       | -                          | -                           | -                             | -                             | -                            | -              | -                                      | -                                     | 12 (8-21)^             |
| <i>Vennix et al.</i>           | Lap      | 39     | 1 (2.6)            | 17 (43.6)                  | 11 (36.7)                   | 5 (12.8)                      | -                             | -                            | -              | -                                      | -                                     | 7 (5-13)               |
|                                | Open     | 78     | 3 (3.8)            | 51 (66.2)                  | 28 (50.0)                   | 15 (19.5)                     | -                             | -                            | -              | -                                      | -                                     | 9 (7-14)               |
| <i>Watanabe et al.</i>         | Lap      | 30     | 0 (0.0)            | 11 (37.0)                  | -                           | 0 (0.0)                       | 4 (13.3)                      | 0 (0.0)                      | 4 (13.0)       | 0 (0.0)                                | -                                     | 23 (14-65)'            |
|                                | Open     | 30     | 1 (3.0)            | 19 (63.0)                  | -                           | 4 (13.0)                      | 4 (13.3)                      | 2 (6.7)                      | 4 (13.0)       | 3 (13.0)                               | -                                     | 33 (18-101)'           |

Table 3) Short-term outcomes after laparoscopic and open emergency surgery for colorectal disease. ICU: intensive care unit, LOS: length of stay (presented as mean and SD, unless specified differently.)\*: ICU admissions included ventilator dependency, \*\*: wound infections included superficial and deep SSIs, \*\*\*: pulmonary complications included pneumonia, pulmonary insufficiency, pleural infusion, unplanned intubation, pulmonary complications, respiratory complications, pulmonary embolism, \*\*\*\*: cardiac complications included cardiac complications, myocardial infarction, atrial fibrillation / cardiac arrhythmia, acute coronary syndrome, CPR, acute heart failure (decompensated), \*\*\*\*\*: length of stay was reported as \*: mean and range, ^: median and IQR, ': median and range (min-max).

**SUPPLEMENTARY TABLE 3B: Short-term outcomes after emergency colorectal surgery laparoscopic vs. open approach.**

| Study                          | Approach | Anastomotic leakages | Intra-abdominal infection/ abscess | Readmissions |
|--------------------------------|----------|----------------------|------------------------------------|--------------|
|                                |          | N (%)                | N (%)                              | N (%)        |
| <i>Ballian et al.</i>          | Lap.     | -                    | 10 (3.0)                           | -            |
|                                | Open     | -                    | 193 (6.0)                          | -            |
| <i>Cassini et al.</i>          | Lap.     | -                    | 0 (0.0)                            | -            |
|                                | Open     | -                    | 2 (8.3)                            | -            |
| <i>Catani et al.</i>           | Lap.     | -                    | -                                  | -            |
|                                | Open     | -                    | -                                  | -            |
| <i>Cocorullo et al.</i>        | Lap.     | -                    | -                                  | -            |
|                                | Open     | -                    | -                                  | -            |
| <i>Cui et al.</i>              | Lap.     | -                    | 0 (0.0)                            | -            |
|                                | Open     | -                    | 5 (7.9)                            | -            |
| <i>Dunker et al.</i>           | Lap.     | -                    | 1 (10.0)                           | -            |
|                                | Open     | -                    | 2 (6.3)                            | -            |
| <i>Gietelink et al.</i>        | Lap.     | -                    | -                                  | -            |
|                                | Open     | -                    | -                                  | -            |
| <i>Harji et al.</i>            | Lap.     | -                    | -                                  | -            |
|                                | Open     | -                    | -                                  | -            |
| <i>Keller et al.</i>           | Lap.     | -                    | -                                  | -            |
|                                | Open     | -                    | -                                  | -            |
| <i>Kim et al.</i>              | Lap.     | 1 (9.0)              | -                                  | -            |
|                                | Open     | 0 (0.0)              | -                                  | -            |
| <i>Koh et al.</i>              | Lap.     | -                    | -                                  | -            |
|                                | Open     | -                    | -                                  | -            |
| <i>Lee et al.</i>              | Lap.     | 23 (5.1)             | 54 (11.9)                          | 49 (10.7)    |
|                                | Open     | 129 (3.9)            | 369 (11.2)                         | 310 (9.4)    |
| <i>Letarte et al.</i>          | Lap.     | 2 (5.1)              | 2 (5.1)                            | -            |
|                                | Open     | 2 (3.0)              | 7 (8.1)                            | -            |
| <i>Li et al., (2009)</i>       | Lap.     | -                    | 0 (0.0)                            | -            |
|                                | Open     | -                    | 1 (8.3)                            | -            |
| <i>Li et al., (2015)</i>       | Lap.     | 0 (0.0)              | -                                  | -            |
|                                | Open     | 1 (4.0)              | -                                  | -            |
| <i>Liu et al.</i>              | Lap.     | 1 (1.8)              | 0 (0.0)                            | -            |
|                                | Open     | 4 (3.0)              | 1 (0.74)                           | -            |
| <i>Marceau et al.</i>          | Lap.     | 3 (7.5)              | -                                  | -            |
|                                | Open     | 3 (6.3)              | -                                  | -            |
| <i>Marcello et al.</i>         | Lap.     | -                    | -                                  | -            |
|                                | Open     | -                    | -                                  | -            |
| <i>Moghadamyeghaneh et al.</i> | Lap.     | 19 (7.7)             | 21 (8.4)                           | 34 (13.7)    |
|                                | Open     | 61 (5.9)             | 74 (7.1)                           | 120 (11.5)   |
| <i>Nash et al.</i>             | Lap.     | -                    | -                                  | -            |
|                                | Open     | -                    | -                                  | -            |
| <i>Ng et al.</i>               | Lap.     | -                    | -                                  | -            |
|                                | Open     | -                    | -                                  | -            |
| <i>Odermatt et al.</i>         | Lap.     | 1 (3.3)              | 3 (8.3)                            | 3 (8.3)      |
|                                | Open     | 1 (1.8)              | 3 (4.2)                            | 5 (6.9)      |
| <i>Schloricke et al.</i>       | Lap.     | -                    | 0 (0.0)                            | -            |
|                                | Open     | -                    | 1 (4.2)                            | -            |
| <i>Stulberg et al.</i>         | Lap.     | 0 (0.0)              | 3 (8.0)                            | 3 (8.0)      |
|                                | Open     | 0 (0.0)              | 2 (8.0)                            | 2 (8.0)      |
| <i>Sujatha-bhaskar et al.</i>  | Lap.     | 48 (4.6)             | -                                  | 76 (7.3)     |
|                                | Open     | 339 (3.8)            | -                                  | 807 (9.0)    |
| <i>Turley et al.</i>           | Lap.     | -                    | 3 (4.5)                            | -            |
|                                | Open     | -                    | 2 (3.0)                            | -            |
| <i>Vallance et al.</i>         | Lap.     | -                    | -                                  | 314 (10.5)   |
|                                | Open     | -                    | -                                  | 897 (9.0)    |
| <i>Vennix et al.</i>           | Lap.     | -                    | -                                  | -            |
|                                | Open     | -                    | -                                  | -            |
| <i>Watanabe et al.</i>         | Lap.     | -                    | 1 (3.0)                            | -            |
|                                | Open     | -                    | 4 (13.3)                           | -            |

Suppl. Table 3) Additional short-term outcomes not reported in main tables.



**SUPPLEMENTARY TABLE 4: Long term outcomes after emergency colorectal surgery laparoscopic vs. open approach.**

| Author                 | Approach | N  | 3-year overall survival<br>% (95% CI) | 3-year recurrence-free survival<br>% (95% CI) | Incisional hernia<br>N (%) |
|------------------------|----------|----|---------------------------------------|-----------------------------------------------|----------------------------|
| <i>Kim et al.</i>      | Lap      | 11 | 90.9*                                 | 90.9*                                         | -                          |
|                        | Open     | 38 | 94.7*                                 | 94.7*                                         | -                          |
| <i>Liu et al.</i>      | Lap      | 22 | 90.9*                                 | 86.4*                                         | -                          |
|                        | Open     | 78 | 85.9*                                 | 78.2*                                         | -                          |
| <i>Odermatt et al.</i> | Lap      | 36 | 51.1 (34.5-75.7)                      | 34.9 (20.4-59.5)                              | -                          |
|                        | Open     | 72 | 43.2 (32.3-57.9)                      | 36.6 (26.6-50.3)                              | -                          |
| <i>Cassini et al.</i>  | Lap      | 36 | -                                     | -                                             | 2 (5%)                     |
|                        | Open     | 24 | -                                     | -                                             | 6 (25%)                    |
| <i>Dunker et al.</i>   | Lap      | 10 | -                                     | -                                             | 0 (0%)                     |
|                        | Open     | 32 | -                                     | -                                             | 2 (6.3%)                   |
| <i>Nash et al.</i>     | Lap      | 36 | -                                     | -                                             | 1 (3%)                     |
|                        | Open     | 32 | -                                     | -                                             | 5 (16%)                    |

Suppl. Table 4) \*: These studies only reported crude rates, without number of patients at risk, thus without adjustment for patients who were lost to follow-up.

**SUPPLEMENTARY TABLE 5: Definitions of outcomes as described in original studies.**

| <b>Study</b>            | <b>Mortality</b>                      | <b>Overall morbidity</b>                  | <b>ICU* admission</b> | <b>Reintervention</b> | <b>Wound infection</b>              | <b>Wound dehiscence</b> | <b>Ileus</b>      | <b>Pulmonary complications</b>                       | <b>Cardiac complications</b> | <b>LOS***</b>             |
|-------------------------|---------------------------------------|-------------------------------------------|-----------------------|-----------------------|-------------------------------------|-------------------------|-------------------|------------------------------------------------------|------------------------------|---------------------------|
| <i>Ballian et al.</i>   | 30-day postoperative mortality        | 30-day morbidity                          | -                     | 30-day reoperation    | -                                   | -                       | -                 | Pneumonia, ventilator > 48 hours                     | -                            | Length of hospital stay   |
| <i>Cassini et al.</i>   | Mortality                             | Morbidity                                 | ICU                   | -                     | Surgical site infection             | Wound dehiscence        | Ileal obstruction | Pleural effusion, pneumonia, pulmonary insufficiency | Cardiac decompensation       | Hospital stay             |
| <i>Catani et al.</i>    | 30-day mortality                      | 30-day morbidity                          | -                     | -                     | -                                   | Dehiscence              | -                 | -                                                    | -                            | Length of hospital stay   |
| <i>Cocorullo et al.</i> | Mortality                             | Morbidity                                 | -                     | -                     | -                                   | -                       | -                 | -                                                    | -                            | -                         |
| <i>Cui et al.</i>       | -                                     | -                                         | -                     | -                     | Wound infection                     | -                       | -                 | -                                                    | -                            | Duration of hospital stay |
| <i>Dunker et al.</i>    | Mortality                             | Morbidity, minor and major complications  | -                     | Relaparotomy          | -                                   | Abdominal burst         | -                 | -                                                    | -                            | Hospital stay             |
| <i>Gietelink et al.</i> | 30-day mortality                      | -                                         | -                     | -                     | -                                   | -                       | -                 | -                                                    | -                            | -                         |
| <i>Harji et al.</i>     | 30 and 90-day postoperative mortality | 30 and 90-day postoperative complications | -                     | -                     | -                                   | -                       | -                 | -                                                    | -                            | -                         |
| <i>Keller et al.</i>    | Mortality                             | All complications                         | -                     | -                     | -                                   | -                       | -                 | -                                                    | -                            | Length of stay            |
| <i>Kim et al.</i>       | Short-term mortality                  | 30-day complications                      | ICU admission         | -                     | -                                   | -                       | Obstruction       | Pulmonary complication                               | -                            | Hospital stay             |
| <i>Koh et al.</i>       | Mortality                             | Postoperative morbidity                   | -                     | Reoperation           | -                                   | -                       | Ileus             | Pulmonary complication                               | -                            | Duration of hospital stay |
| <i>Lee et al.</i>       | 30-day mortality                      | Any complication                          | -                     | Reoperation           | Superficial and deep incisional SSI | -                       | Ileus             | Unplanned intubation, pneumonia                      | -                            | Hospital length of stay   |
| <i>Letarte et al.</i>   | 30-day postoperative mortality        | 30-day overall morbidity                  | -                     | Reoperation           | Superficial SSI                     | -                       | Prolonged ileus   | -                                                    | -                            | Length of stay            |

|                                |                                |                                   |                                   |                                                |                           |                  |                                      |                                                                                                               |                                                         |                             |
|--------------------------------|--------------------------------|-----------------------------------|-----------------------------------|------------------------------------------------|---------------------------|------------------|--------------------------------------|---------------------------------------------------------------------------------------------------------------|---------------------------------------------------------|-----------------------------|
| <i>Li et al., (2009)</i>       | Operative mortality            | Postoperative complications       | -                                 | Image guided percutaneous drainage             | Wound infection           | -                | Prolonged ileus                      | -                                                                                                             | -                                                       | Hospital stay               |
| <i>Li et al., (2015)</i>       | Postoperative mortality        | Postoperative complications       | -                                 | -                                              | Incision infection        | -                | -                                    | Pulmonary infection                                                                                           | -                                                       | Postoperative hospital stay |
| <i>Liu et al.</i>              | Short-term postoperative death | Complications (all)               | -                                 | -                                              | Incisional infection      | -                | Postoperative intestinal obstruction |                                                                                                               | -                                                       | Hospital stay time          |
| <i>Marceau et al.</i>          | 30-day mortality               | Overall morbidity                 | -                                 | Relaparotomy                                   | -                         | -                | -                                    | -                                                                                                             | -                                                       | Hospital stay               |
| <i>Marcello et al.</i>         | -                              | Complications                     | -                                 | -                                              | Wound infection           | -                | Ileus                                | -                                                                                                             | -                                                       | Length of hospital stay     |
| <i>Moghadamyeghaneh et al.</i> | 30-day mortality               | 30-day overall morbidity          | -                                 | Unplanned reoperation                          | Superficial and deep SSIs | Wound disruption | Prolonged ileus                      | Respiratory complications (unplanned intubations, ventilator dependency >48 h, pneumonia), pulmonary embolism | Cardiac arrest requiring CPR****, myocardial infarction | Hospitalization length      |
| <i>Nash et al.</i>             | 30-day mortality               | 30-day morbidity                  | -                                 | -                                              | -                         | -                | -                                    | -                                                                                                             | -                                                       | Length of hospital stay     |
| <i>Ng et al.</i>               | Postoperative death            | Total number of complications     | -                                 | -                                              | Wound infection           | -                | Prolonged ileus                      | Respiratory failure, pulmonary embolism, chest infection                                                      | Acute coronary syndrome, atrial fibrillation            | Hospital stay               |
| <i>Odermatt et al.</i>         | 30-day mortality               | -                                 | -                                 | Surgical complication needing a reintervention | Wound infection           | -                | -                                    | -                                                                                                             | -                                                       | Length of stay              |
| <i>Schloricke et al.*</i>      | Exitus letalis                 | Postoperative Komplikationen      | Intensive-medizinische Behandlung | -                                              | -                         | Platzbauch       | Darmatonie                           | Pleuraerguss, pneumonie                                                                                       | Kardiale Ereignisse                                     | Krankenhaus-verweildauer    |
| <i>Stulberg et al.</i>         | 30-day mortality               | Early postoperative complications | ICU stay required                 | Reoperations                                   | SSI                       | Dehiscence       | -                                    | Postoperative intubation, pneumonia, pulmonary embolism                                                       | Myocardial infarction                                   | Time to discharge           |
| <i>Sujatha-bhaskar et al.</i>  | 30-day mortality               | Overall morbidity                 | -                                 | Unplanned reoperations                         | Any SSI                   | -                | Ileus                                | Pneumonia                                                                                                     | Myocardial infarction                                   | -                           |

|                        |                       |                                                  |                             |                                                             |                                               |                  |       |                                                                                     |                                       |                                       |
|------------------------|-----------------------|--------------------------------------------------|-----------------------------|-------------------------------------------------------------|-----------------------------------------------|------------------|-------|-------------------------------------------------------------------------------------|---------------------------------------|---------------------------------------|
| <i>Turley et al.</i>   | 30-day mortality      | 30-day morbidity/overall complication rate       | -                           | Return to the operating room                                | Superficial and deep surgical site infections | Wound dehiscence | -     | Pneumonia, unplanned reintubation, pulmonary embolism, prolonged ventilator support | Cardiac arrest, myocardial infarction | Length of postoperative hospital stay |
| <i>Vallance et al.</i> | 90-day mortality      | -                                                | -                           | 30-day reoperations                                         | -                                             | -                | -     | -                                                                                   | -                                     | Length of hospital stay               |
| <i>Vennix et al.</i>   | In-hospital mortality | In-hospital morbidity                            | Postoperative ICU admission | Reinterventions (surgical and percutaneous reinterventions) | -                                             | -                | -     | -                                                                                   | -                                     | Postoperative hospital stay           |
| <i>Watanabe et al.</i> | Mortality             | Number of complications during the hospital stay | -                           | Relaparotomies                                              | Surgical site infections                      | -                | Ileus | P. Jiroveci and fungal pneumonia                                                    | -                                     | Postoperative hospital stay           |

Suppl. Table 5) \*ICU: intensive care unit, \*\* SSI: surgical site infection, \*\*\*LOS: length of stay, SSI: surgical site infection, \*\*\*\* CPR: Cardiopulmonary resuscitation. Schloricke et al. exicutis letalis: lethal outcome, postoperative Komplikationen: postoperative complications, Intensivmedizinische Behandlung: Intensive medical treatment, Platzbauch: fascial dehiscence, Darmatonie: atonic bowel, Pleuraeguss: pleura effusion, Pneumonie: pneumonia, Kardiale Ereignisse: cardiac events, Krankenhausverweildauer: hospital stay duration.

**SUPPLEMENTARY TABLE 6: Quality assessment of the included randomized and non-randomized studies.**  
**SUPPLEMENTARY TABLE 6A: Quality assessment of the included non-randomized studies.**

| Author                         | Selection (****) | Comparability (**) | Outcome (***) | Total Score | Quality* |
|--------------------------------|------------------|--------------------|---------------|-------------|----------|
| <i>Ballian et al.</i>          | ***              | **                 | ***           | 8 out of 9  | Good     |
| <i>Cassini et al.</i>          | ***              | *                  | ***           | 7 out of 9  | Good     |
| <i>Catani et al.</i>           | ***              | **                 | *             | 6 out of 9  | Poor     |
| <i>Cocorullo et al.</i>        | ***              |                    | *             | 4 out of 9  | Poor     |
| <i>Cui et al.</i>              | ***              | **                 | **            | 7 out of 9  | Good     |
| <i>Dunker et al.</i>           | ***              | *                  | *             | 5 out of 9  | Poor     |
| <i>Gietelink et al.</i>        | ***              | *                  | ***           | 7 out of 9  | Good     |
| <i>Harji et al.</i>            |                  |                    |               |             | NA       |
| <i>Keller et al.</i>           | ***              | *                  | ***           | 7 out of 9  | Good     |
| <i>Kim et al.</i>              | ***              | *                  | ***           | 7 out of 9  | Good     |
| <i>Koh et al.</i>              | **               | **                 | **            | 6 out of 9  | Fair     |
| <i>Lee et al.</i>              | ***              | **                 | ***           | 8 out of 9  | Good     |
| <i>Letarte et al.</i>          | ***              |                    | **            | 5 out of 9  | Poor     |
| <i>Li et al., (2009)</i>       | ***              | *                  | *             | 5 out of 9  | Poor     |
| <i>Li et al., (2015)</i>       | **               | **                 | *             | 5 out of 9  | Poor     |
| <i>Liu et al.</i>              | ***              | *                  | ***           | 7 out of 9  | Good     |
| <i>Marceau et al.</i>          | **               | **                 | ***           | 7 out of 9  | Good     |
| <i>Marcello et al.</i>         | **               | **                 | *             | 5 out of 9  | Poor     |
| <i>Moghadamyeghaneh et al.</i> | ***              | **                 | ***           | 8 out of 9  | Good     |
| <i>Nash et al.</i>             | ***              |                    | ***           | 6 out of 9  | Poor     |
| <i>Ng et al.</i>               | ***              | **                 | *             | 6 out of 9  | Poor     |
| <i>Odermatt et al.</i>         | ***              | **                 | **            | 7 out of 9  | Good     |
| <i>Schloricke et al.</i>       | ***              |                    | *             | 4 out of 9  | Poor     |
| <i>Stulberg et al.</i>         | ***              | **                 | ***           | 8 out of 9  | Good     |
| <i>Sujatha-bhaskar et al.</i>  | ***              | **                 | ***           | 8 out of 9  | Good     |
| <i>Turley et al.</i>           | ***              | **                 | ***           | 8 out of 9  | Good     |
| <i>Vallance et al.</i>         | ***              | **                 | ***           | 8 out of 9  | Good     |
| <i>Vennix et al.</i>           | ***              | **                 | **            | 7 out of 9  | Good     |
| <i>Watanabe et al.</i>         | ***              | *                  | *             | 5 out of 9  | Poor     |

Suppl. Table 6A) Assessment of quality of nonrandomized studies according to the Newcastle-Ottawa Scale.

**SUPPLEMENTARY TABLE 6B: Quality assessment of the included randomized controlled study.**

| Domain                                        | Support for judgement                                                                                                                                                    | Review authors' judgement                                                                                                                                                    | Risk of bias score                                                                  |
|-----------------------------------------------|--------------------------------------------------------------------------------------------------------------------------------------------------------------------------|------------------------------------------------------------------------------------------------------------------------------------------------------------------------------|-------------------------------------------------------------------------------------|
| <b>Selection bias</b>                         |                                                                                                                                                                          |                                                                                                                                                                              |                                                                                     |
| <b>Random sequence generation</b>             | Randomization was performed centrally, with patients randomized on a 1:1 basis between laparoscopic or open surgery using minimization of incorporating a random element | Low risk of selection bias due to adequate generation of randomized sequence                                                                                                 |  |
| <b>Allocation concealment</b>                 | The authors do not describe whether allocation to treatment was concealed prior to assignment                                                                            | Unknown concealment of allocation prior to assignment                                                                                                                        |  |
| <b>Performance bias</b>                       |                                                                                                                                                                          |                                                                                                                                                                              |                                                                                     |
| <b>Blinding of participants and personnel</b> | Patients were blinded to the treatment allocation for up to 7 days after surgery, or until the day of discharge if earlier. Personnel was not blinded.                   | Low risk of performance bias due to blinded patients, however personnel was not blinded to allocation resulting in high risk of performance bias. "                          |  |
| <b>Detection bias</b>                         |                                                                                                                                                                          |                                                                                                                                                                              |                                                                                     |
| <b>Blinding of outcome assessment</b>         | The authors do not describe whether outcomes assessors were blinded for treatment allocation                                                                             | There could have been detection bias due to knowledge of patients' treatment assignment                                                                                      |  |
| <b>Attrition bias</b>                         |                                                                                                                                                                          |                                                                                                                                                                              |                                                                                     |
| <b>Incomplete outcome data</b>                | All randomized patients were included in outcome analysis, unless they were lost to follow-up low risk                                                                   | Low risk of attrition bias as there was a small amount of incomplete outcome data "Baseline compliance for clinical and "HRQoL data was 99.8 and 93.8 per cent respectively. |  |
| <b>Reporting bias</b>                         |                                                                                                                                                                          |                                                                                                                                                                              |                                                                                     |
| <b>Selective reporting</b>                    | The authors extensively reported how they collected data, how data compliance was calculated for each of the follow-up time points and reported outcomes completely      | Low risk of reporting bias as there was no selective outcome reporting                                                                                                       |  |

Suppl. Table 6B) Assessment of quality of randomized studies according to the Cochrane Risk of Bias Tool.

**Supplementary figure 1 A-C: Forest plots for overall morbidity after emergency colorectal surgery, laparoscopic vs. open approach for complicated diverticulitis, IBD and colorectal cancer.**

**Forest plot 1A: overall morbidity complicated diverticulitis.**

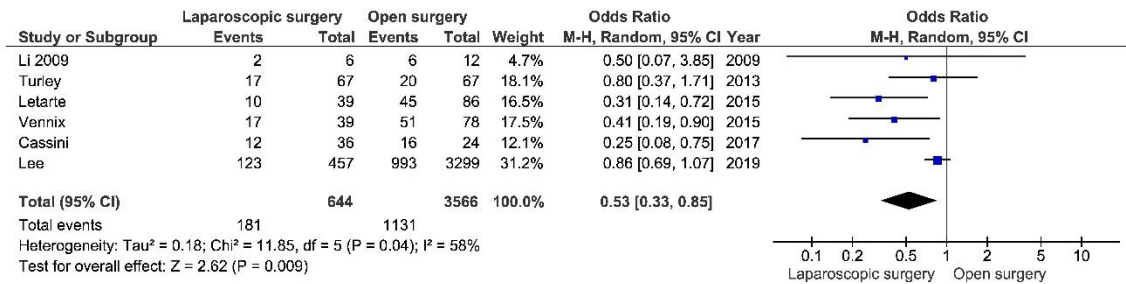

Suppl. Fig. 1A) Overall morbidity after laparoscopic vs open emergency surgery for complicated diverticulitis.

**Forest plot 1B: overall morbidity IBD.**

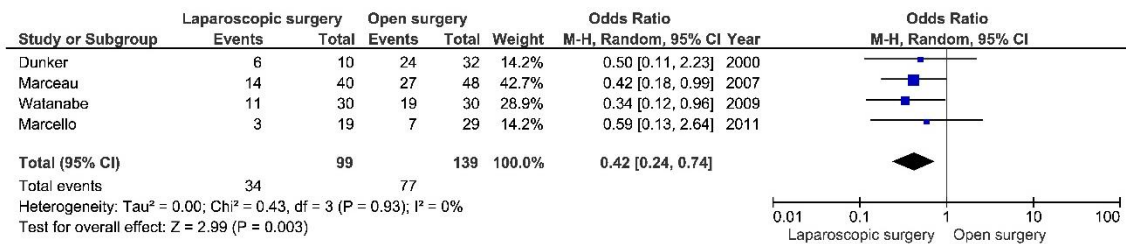

Suppl. Fig. 1B) Overall morbidity after laparoscopic vs open emergency surgery for Inflammatory bowel disease.

**Forest plot 1C: overall morbidity colorectal cancer.**

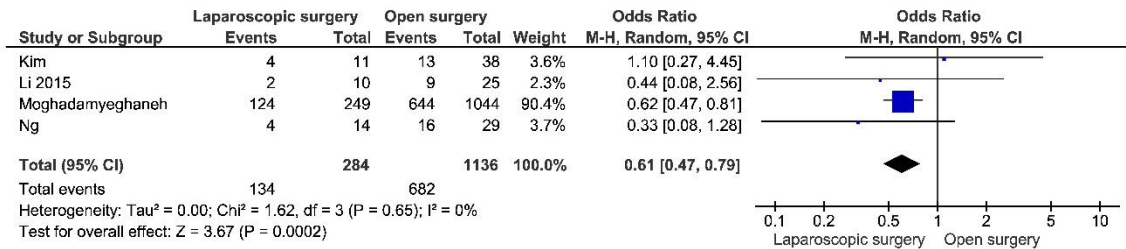

Suppl. Fig. 1C) Overall morbidity after laparoscopic vs open emergency surgery for colorectal cancer.

**Supplementary figure 2A-E: Forest plots for the secondary outcomes after emergency colorectal surgery, laparoscopic vs. open approach.**

**Forest plot 2A: ICU admissions.**

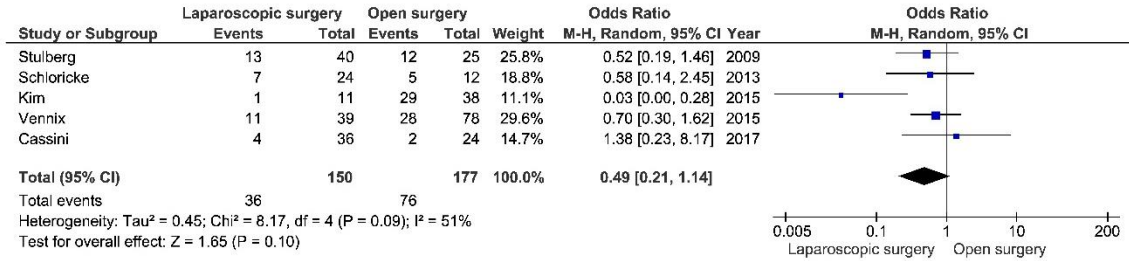

Suppl. Fig. 2A: ICU admission after laparoscopic vs. open emergency colorectal surgery.

**Forest plot 2B: Reinterventions.**

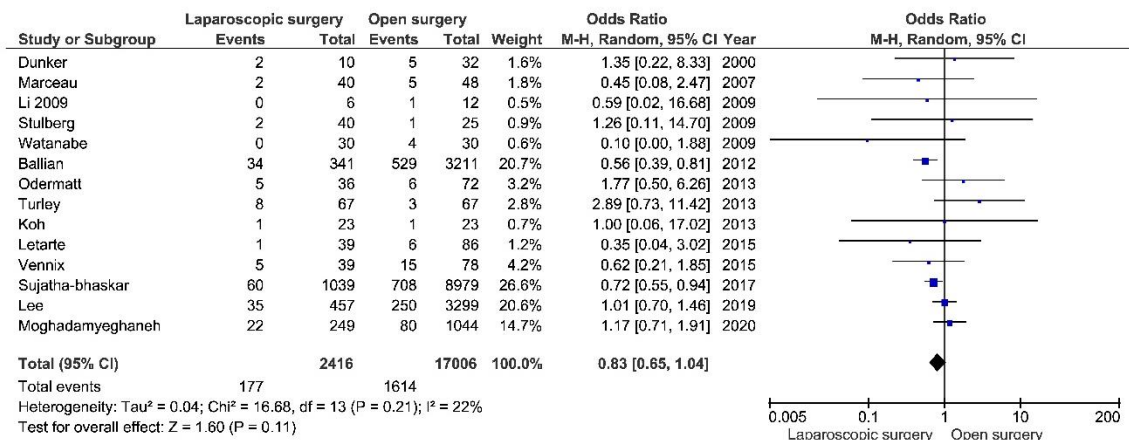

Suppl. Fig. 2B: Reintervention after laparoscopic vs. open emergency colorectal surgery. Vallance et al. was not included in the meta-analyses, due to discrepancy of numbers in the text and tables for reinterventions.

**Forest plot 2C: Wound dehiscence.**

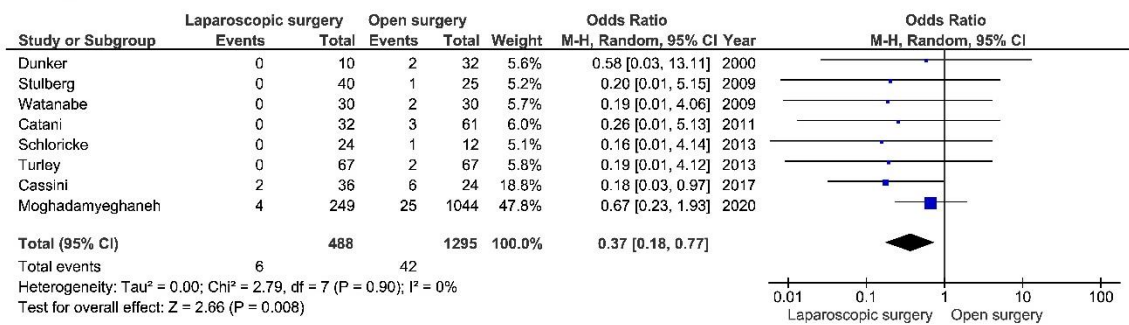

Suppl. Fig. 2C: Wound dehiscence after laparoscopic vs. open emergency colorectal surgery.



**Forest plot 2D: Pulmonary complications.**

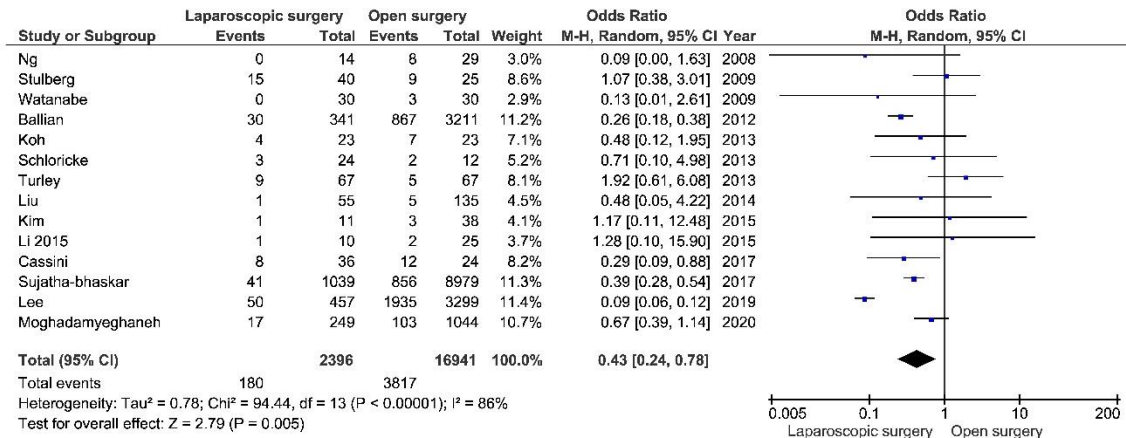

Suppl. Fig. 2D: Pulmonary complications after laparoscopic vs. open emergency colorectal surgery.

**Forest plot 2E: Cardiac complications.**

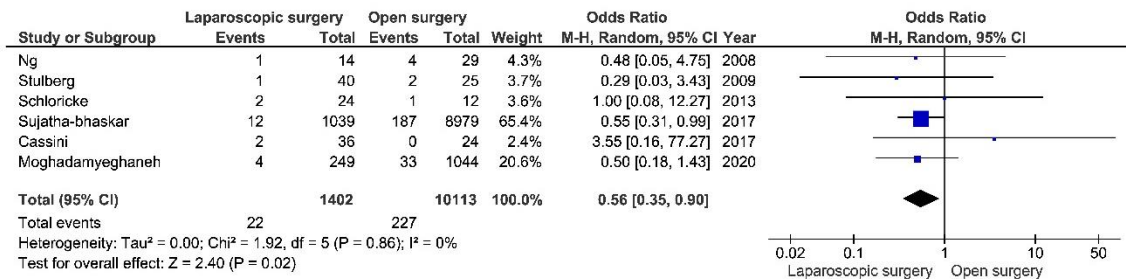

Suppl. Fig. 2E: Cardiac complications after laparoscopic vs open emergency colorectal surgery.
